# Supplementary material for: Identification of Cancer–associated metabolic vulnerabilities by modeling multi-objective optimality in metabolism
Source: Cell Commun Signal. 2019 Oct 10;17:124. doi: 10.1186/s12964-019-0439-y (PMC6785927; doi:10.1186/s12964-019-0439-y)
Supplement: Supplementary file 5 — Additional file 5: Table S4. Complete lists of tumor-suppressive, pro-oncogenic and ambiguous enzymes and genes. (XLSX 25 kb) [file 12964_2019_439_MOESM5_ESM.xlsx]

## Sheet: Tumor-suppressive enzymes
2-Oxoadipate:lipoamde 2-oxidoreductase(decarboxylating and acceptor-succinylating) (mitochondria)
2-oxoadipate shuttle (cytosol/mitochondria) fwd
2-aminoadipate transaminase, irreversible
ATP-Citrate lyase
L-aspartate transport via Na, H symport and K antiport
CTP synthase (NH3)
fructose-bisphosphate aldolase fwd
glutaminase (mitochondrial)
glutaryl-CoA dehydrogenase (mitochondria)
inositol transport via sodium symport fwd
Lysine mitochondrial transport via ornithine carrier fwd
malate dehydrogenase, mitochondrial fwd
pyrroline-5-carboxylate reductase
phosphofructokinase
saccharopine dehydrogenase (NADP, L-lysine forming), mitochondrial
saccharopine dehydrogenase (NAD, L-glutamate forming), mitochondrial
L-threonine via sodium symport
triose-phosphate isomerase fwd

## Sheet: Pro-oncogenic enzymes
alpha-ketoglutarate/malate transporter fwd
L-arginine transport via diffusion (extracellular to cytosol)
Asparagine transport (Na, H coupled) fwd
aspartate transaminase fwd
ATP synthase (four protons for one ATP)
Biotin reversible transport via proton symport fwd
cytochrome c oxidase, mitochondrial Complex IV
ubiquinol-6 cytochrome c reductase, Complex III
Diacylglycerol phosphate kinase (homo sapiens) fwd
dihydroorotase fwd
formimidoyltransferase cyclodeaminase
glycerol-3-phosphate dehydrogenase (NAD) fwd
D-galactose transport via proton symport fwd
Glutamine transport (Na, H coupled) fwd
L-glutamate reversible transport via proton symport, mitochondrial fwd
Glutamate formimidoyltransferase
H2O transport via diffusion fwd
hexokinase (D-glucose:ATP)
histidase
L-histidine transport via diffusion (extracellular to cytosol)
IMP cyclohydrolase fwd
L-lactate dehydrogenase fwd
L-lysine transport via diffusion (extracellular to cytosol)
L-lactate reversible transport via proton symport fwd
methionine synthase
NADH dehydrogenase, mitochondrial
orotate phosphoribosyltransferase fwd
pyruvate dehydrogenase
phosphoglycerate dehydrogenase
phosphoglycerate kinase fwd
phosphoglycerate mutase fwd
phosphoserine transaminase
phosphoserine phosphatase (L-serine)
ribose-5-phosphate isomerase fwd
superoxide dismutase
UMP kinase fwd
UMP kinase (CTP) fwd
UMP kinase (GTP) fwd
urocanase

## Sheet: Ambiguous enzymes
acetyl-CoA carboxylase
adenylate kinase fwd
adenosine kinase
adenylosuccinate lyase
adenylosuccinate lyase
adenylosuccinate synthase
1-acylglycerol-3-phosphate O-acyltransferase 1
adenosylhomocysteinase fwd
phosphoribosylaminoimidazolecarboxamide formyltransferase fwd
phosphoribosylaminoimidazole carboxylase fwd
aspartate carbamoyltransferase (reversible) fwd
Biotin uptake (antiport)
C-14 sterol reductase
C-3 sterol dehydrogenase (4-methylzymosterol)
C-3 sterol keto reductase (zymosterol)
C-4 sterol methyl oxidase (4,4-dimethylzymosterol)
C-4 methyl sterol oxidase
carbamoyl-phosphate synthase (glutamine-hydrolysing)
choline phosphotransferase
choline phosphate cytididyltransferase
Choline kinase
CoA transporter fwd
cytidylate kinase (CMP) fwd
diacylglycerol acyltransferase
24-dehydrocholesterol reductase [Precursor]
24-dehydrocholesterol reductase [Precursor]
7-dehydrocholesterol reductase
7-dehydrocholesterol reductase
dihydoorotic acid dehydrogenase (quinone10)
dimethylallyltranstransferase
diphosphomevalonate decarboxylase
3-beta-hydroxysteroid-delta(8),delta(7)-isomerase
enolase fwd
fatty acyl-CoA synthase (n-C10:0CoA)
fatty-acyl-CoA synthase (n-C12:0CoA)
fatty-acyl-CoA synthase (n-C14:0CoA)
fatty-acyl-CoA synthase (n-C16:0CoA)
fatty acyl-CoA synthase (n-C8:0CoA), lumped reaction
galactose transport (uniport) fwd
glyceraldehyde-3-phosphate dehydrogenase fwd
phosphoribosylglycinamide formyltransferase fwd
glucose transport (uniport) fwd
glutamine phosphoribosyldiphosphate amidotransferase
GMP synthase
glycerol-3-phosphate acyltransferase
geranyltranstransferase
carboxylic acid dissociation fwd
Hydroxymethylglutaryl CoA reductase (ir)
Hydroxymethylglutaryl CoA synthase (ir)
L-isoleucine transport via diffusion (extracellular to cytosol) fwd
IMP dehydrogenase
isopentenyl-diphosphate D-isomerase fwd
L-leucine transport via diffusion (extracellular to cytosol) fwd
cytochrome P450 lanosterol 14-alpha-demethylase
lanosterol synthase
lipase
Lathosterol oxidase
Lathosterol oxidase
methionine adenosyltransferase
mevalonate kinase (atp)
orotidine-5-phosphate decarboxylase
phosphatidylethanolamine N-methyltransferase
phosphate transport in/out via Na+ symporter fwd
phosphate transport, endoplasmic reticulum fwd
phosphomevalonate kinase
inorganic diphosphatase
inorganic diphosphatase, endoplasmic reticulum
phosphoribosylglycinamide synthase fwd
phosphoribosylaminoimidazole synthase
phosphoribosylaminoimidazolesuccinocarboxamide synthase fwd
phosphoribosylformylglycinamidine synthase
Proline dehydrogenase
phosphoribosylpyrophosphate synthetase fwd
Phosphatidylserine decarboxylase
phosphatidylserine flippase
Phosphatidylserine synthase homo sapiens fwd
pyruvate kinase
sulfate transport via chloride countertransport (2:1)
Squalene epoxidase, endoplasmic reticular (NADP)
Squalene synthase
L-valine transport via diffusion (extracellular to cytosol) fwd

## Sheet: Tumor_suppressive genes
Entrez ID	Gene Symbol	Hazard ratio	p-value
47	ACLY	1.16	0.019
226	ALDOA	1.21	0.00085
229	ALDOB	1.09	0.18
230	ALDOC	1.15	0.027
1503	CTPS1	1	0.5
1738	DLD	0.54	1.6e-11
1743	DLST	0.75	1.2e-06
2639	GCDH	0.66	4.3e-11
2744	GLS	0.71	1.6e-08
4191	MDH2	0.7	1.1e-09
4967	OGDH	0.87	0.022
5211	PFKL	1	0.5
5213	PFKM	0.79	0.00033
5214	PFKP	1.62	1e-16
6505	SLC1A1	1	0.5
6506	SLC1A2	1	0.5
6507	SLC1A3	1	0.5
6511	SLC1A6	1	0.5
6512	SLC1A7	1	0.5
6526	SLC5A3	1	0.5
7167	TPI1	1	0.5
8050	PDHX	1.42	4.7e-09
10157	AASS	0.66	1e-12
10166	SLC25A15	1.1	0.11
11254	SLC6A14	0.75	2.6e-06
27165	GLS2	0.66	4.9e-13
29920	PYCR2	0.63	6.3e-08
51166	AADAT	1.3	0.0036
54407	SLC38A2	1	0.5
65263	PYCRL	1.37	1e-05
81539	SLC38A1	1	0.5
83884	SLC25A2	0.54	7.7e-13
89874	SLC25A21	0.81	0.00032
286016	TPI1P2	1	0.5

## Sheet: Pro-oncogenic genes
Entrez ID	Gene Symbol	Hazard ratio	p-value
471	ATIC	1.23	0.00079
498	ATP5A1	1.08	0.22
506	ATP5B	1.39	1.5e-07
509	ATP5C1	1.63	1e-16
513	ATP5D	0.84	0.0029
514	ATP5E	1.61	6.7e-16
515	ATP5F1	1.36	1.1e-06
516	ATP5G1	0.82	0.0025
517	ATP5G2	0.89	0.048
518	ATP5G3	1.29	0.0048
521	ATP5I	1	0.5
522	ATP5J	1.66	1e-16
669	BPGM	1.3	8e-06
790	CAD	1	0.5
1327	COX4I1	1.63	1e-16
1329	COX5B	1.57	6.8e-15
1337	COX6A1	1.35	2.4e-07
1339	COX6A2	0.66	7e-11
1340	COX6B1	1.51	5.9e-13
1345	COX6C	0.78	0.00017
1346	COX7A1	0.74	1.4e-05
1347	COX7A2	1.49	7.2e-11
1349	COX7B	1.62	1e-16
1350	COX7C	1.36	8.5e-07
1351	COX8A	1.19	0.014
1537	CYC1	1.57	7.8e-14
1606	DGKA	0.56	1e-16
1607	DGKB	0.73	0.0002
1608	DGKG	0.74	1.8e-06
1609	DGKQ	0.45	1e-16
1737	DLAT	1.46	2.4e-09
1738	DLD	0.54	1.6e-11
2645	GCK	1.43	5.7e-10
2805	GOT1	1.25	0.00018
2819	GPD1	0.74	2e-06
3034	HAL	0.71	8.7e-09
3098	HK1	0.87	0.016
3099	HK2	0.89	0.041
3101	HK3	0.78	7.8e-05
3939	LDHA	1.66	1e-16
3945	LDHB	1.35	2e-07
3948	LDHC	0.89	0.053
4512	COX1	0.79	4.5e-05
4513	COX2	0.81	0.00033
4514	COX3	1	0.5
4519	CYTB	1	0.5
4535	ND1	1.47	1.4e-09
4536	ND2	1	0.5
4537	ND3	1	0.5
4538	ND4	1	0.5
4539	ND4L	1	0.5
4540	ND5	1	0.5
4541	ND6	1	0.5
4548	MTR	0.64	2.8e-08
4694	NDUFA1	1.66	1e-16
4695	NDUFA2	1.28	5.9e-05
4696	NDUFA3	1.35	1.8e-07
4697	NDUFA4	1.63	1e-16
4698	NDUFA5	1.26	7.4e-05
4700	NDUFA6	0.82	0.00047
4701	NDUFA7	1.25	0.00016
4702	NDUFA8	1.55	1.1e-13
4704	NDUFA9	1.29	3.2e-05
4705	NDUFA10	0.82	0.0014
4706	NDUFAB1	1.49	6.6e-12
4707	NDUFB1	1.26	0.00027
4708	NDUFB2	1.34	1.2e-06
4709	NDUFB3	1.19	0.0057
4710	NDUFB4	1.52	6.1e-13
4711	NDUFB5	1.63	1e-16
4712	NDUFB6	1.37	2.1e-07
4713	NDUFB7	1.34	4.7e-07
4714	NDUFB8	1.16	0.019
4715	NDUFB9	1.57	1.1e-07
4716	NDUFB10	1.41	3.5e-05
4717	NDUFC1	1.31	1.1e-05
4718	NDUFC2	0.86	0.087
4719	NDUFS1	1.97	1e-16
4720	NDUFS2	0.91	0.15
4722	NDUFS3	1.26	7.5e-05
4723	NDUFV1	1.29	1.8e-05
4724	NDUFS4	1.22	0.002
4725	NDUFS5	1.5	6.3e-11
4726	NDUFS6	1.62	1e-16
4728	NDUFS8	1.43	6.4e-10
4729	NDUFV2	1.14	0.031
4731	NDUFV3	1.69	3.5e-10
4905	NSF	0.93	0.19
5160	PDHA1	1.12	0.088
5161	PDHA2	0.71	6.9e-09
5162	PDHB	1.17	0.025
5223	PGAM1	1.62	1e-16
5224	PGAM2	0.79	8.1e-05
5230	PGK1	1	0.5
5232	PGK2	0.67	7.6e-12
5723	PSPH	1	0.5
6523	SLC5A1	1	0.5
6541	SLC7A1	1	0.5
6542	SLC7A2	1	0.5
6566	SLC16A1	1	0.5
6648	SOD2	1	0.5
7372	UMPS	1	0.5
7381	UQCRB	1	0.5
7384	UQCRC1	1.4	5e-08
7385	UQCRC2	1	0.5
7386	UQCRFS1	1.56	2.2e-12
7388	UQCRH	1.75	1e-16
7991	TUSC3	1	0.5
8050	PDHX	1.42	4.7e-09
8402	SLC25A11	1	0.5
8525	DGKZ	0.81	0.00038
8526	DGKE	1	0.5
8527	DGKD	0.65	9.1e-13
8604	SLC25A12	1	0.5
8781	PSPHP1	1	0.5
9123	SLC16A3	1	0.5
9162	DGKI	0.7	7.2e-10
9167	COX7A2L	1.12	0.061
9194	SLC16A7	1	0.5
9377	COX5A	1	0.5
9551	ATP5J2	1	0.5
10165	SLC25A13	1.56	8.2e-13
10476	ATP5H	1.4	1e-08
10632	ATP5L	0.83	0.002
10841	FTCD	0.65	4.3e-12
10975	UQCR11	0.78	0.014
10991	SLC38A3	0.76	1.5e-05
22934	RPIA	1.1	0.11
23539	SLC16A8	0.74	2.5e-06
26227	PHGDH	1.39	1.1e-08
27089	UQCRQ	0.93	0.23
29796	UQCR10	0.75	0.00086
29968	PSAT1	1.56	8.1e-08
51079	NDUFA13	1.49	9.1e-11
51727	CMPK1	1.25	0.00061
55089	SLC38A4	1	0.5
55293	UEVLD	1	0.5
55967	NDUFA12	1.98	1e-16
79751	SLC25A22	0.7	3e-09
80201	HKDC1	0.69	1.5e-09
83733	SLC25A18	0.76	0.0009
84701	COX4I2	0.56	7.6e-12
84889	SLC7A3	0.57	7.4e-12
92483	LDHAL6B	0.65	4.2e-14
92745	SLC38A5	0.7	1.2e-05
125965	COX6B2	0.58	2.9e-11
126328	NDUFA11	1.61	2.3e-07
131669	UROC1	0.72	6.3e-05
160287	LDHAL6A	0.53	1.2e-13
160851	DGKH	0.81	0.026
170712	COX7B2	0.72	4.8e-05
341947	COX8C	0.74	0.00096
348477	-	1	0.5
374291	NDUFS7	1.22	0.00058

## Sheet: Ambiguous genes
Entrez ID	Gene Symbol	Hazard ratio	p-value
31	ACACA	0.86	0.0073
32	ACACB	0.59	1e-16
132	ADK	0.78	7.5e-05
158	ADSL	1.14	0.022
159	ADSS	0.82	0.00059
191	AHCY	1.18	0.014
203	AK1	1.21	0.0034
471	ATIC	1.23	0.00079
759	CA1	1	0.5
760	CA2	1.13	0.082
761	CA3	0.69	3.3e-10
762	CA4	1	0.5
766	CA7	0.58	1e-16
768	CA9	1.25	0.00044
771	CA12	1	0.5
790	CAD	1	0.5
1119	CHKA	1.18	0.0045
1120	CHKB	0.64	2.7e-14
1595	CYP51A1	1.42	1.8e-09
1717	DHCR7	1.5	1.9e-12
1718	DHCR24	0.7	1.6e-09
1723	DHODH	0.79	5e-05
2023	ENO1	1.63	1e-16
2026	ENO2	1.15	0.027
2027	ENO3	0.71	4.2e-09
2194	FASN	0.8	0.00017
2222	FDFT1	1.24	0.00074
2224	FDPS	1.61	5.6e-16
2538	G6PC	0.77	1.1e-05
2544	-	1	0.5
2597	GAPDH	1.36	6.2e-07
2618	GART	1.38	6.9e-08
3156	HMGCR	1.39	9.5e-07
3158	HMGCS2	0.59	1.3e-10
3295	HSD17B4	0.81	0.00027
3422	IDI1	1.62	1e-16
3614	IMPDH1	0.72	1.2e-07
3615	IMPDH2	0.89	0.043
4023	LPL	0.84	0.0034
4047	LSS	1.18	0.0098
4143	MAT1A	0.64	2.2e-13
4144	MAT2A	0.93	0.28
4597	MVD	1.4	3.2e-08
4598	MVK	0.59	1e-16
5130	PCYT1A	1.42	2.1e-08
5198	PFAS	0.86	0.015
5313	PKLR	1	0.5
5315	PKM	1	0.5
5464	PPA1	1.4	1.8e-08
5471	PPAT	1	0.5
5631	PRPS1	1	0.5
5634	PRPS2	1.38	4.1e-08
6307	MSMO1	1	0.5
6309	SC5D	1	0.5
6513	SLC2A1	1	0.5
6514	SLC2A2	0.69	3.9e-09
6515	SLC2A3	1	0.5
6517	SLC2A4	0.69	2.4e-09
6574	SLC20A1	1.12	0.047
6575	SLC20A2	0.81	0.00071
6713	SQLE	1	0.5
7108	TM7SF2	0.72	4.2e-07
7372	UMPS	1	0.5
8034	SLC25A16	1	0.5
8501	SLC43A1	0.57	1e-16
8694	DGAT1	1.16	0.018
8833	GMPS	2.06	1e-16
9468	PCYT1B	1	0.5
9791	PTDSS1	1.39	5.2e-08
10390	CEPT1	1.33	5.3e-06
10396	ATP8A1	0.73	4.7e-07
10400	PEMT	1.1	0.1
10554	AGPAT1	0.79	9.5e-05
10555	AGPAT2	0.87	0.027
10606	PAICS	1.45	1e-09
10654	PMVK	1.22	0.00099
10682	EBP	1.12	0.06
10768	AHCYL1	0.71	6.1e-09
11182	SLC2A6	1.28	3.4e-05
23632	CA14	0.65	1.4e-12
23761	PISD	0.68	1.4e-10
26237	-	1	0.5
26289	AK5	0.59	1.1e-16
26330	GAPDHS	0.79	7e-05
27430	MAT2B	0.77	6.9e-06
29988	SLC2A8	1.16	0.03
50814	NSDHL	1.44	1.1e-09
51727	CMPK1	1.25	0.00061
55326	AGPAT5	1	0.5
56606	SLC2A9	0.57	1e-16
56894	AGPAT3	1	0.5
56895	AGPAT4	1	0.5
56994	CHPT1	0.63	5.6e-16
57194	ATP10A	1	0.5
57678	GPAM	1	0.5
57818	G6PC2	0.57	1e-16
58510	PRODH2	1	0.5
65010	SLC26A6	0.77	2.4e-05
66035	SLC2A11	1	0.5
80704	SLC19A3	1	0.5
81031	SLC2A10	1.25	0.00047
84649	DGAT2	1	0.5
91734	IDI2	1	0.5
92579	G6PC3	1	0.5
113452	TMEM54	1.21	0.021
122481	AK7	0.76	0.0015
122622	ADSSL1	0.71	2.3e-05
124935	SLC43A2	0.76	0.00063
137964	GPAT4	1	0.5
144195	SLC2A14	0.78	2.1e-05
154091	SLC2A12	1.22	0.029
155184	SLC2A7	1	0.5
221823	PRPS1L1	0.69	2.1e-09
377677	CA13	0.75	0.0011
